# Supplementary material for: Tubb4b is required for multi-ciliogenesis in the mouse
Source: PubMed Central journal article supplement (PMC10820790; doi:10.1242/dev.201819), 2024-01-04
Supplement: develop-151-201819-s1.pdf [file develop-151-201819-s1.pdf]

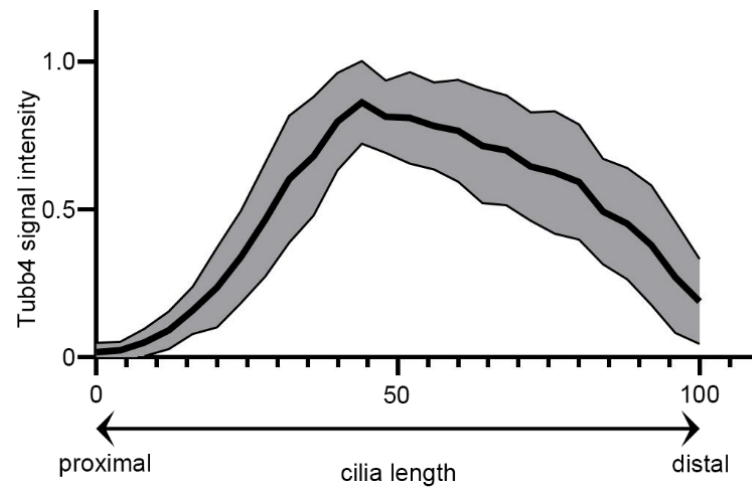

**Fig. S1. Tubb4 immunostaining intensity along proximal-distal position of cilia**

Quantification of Tubb4 immunostaining intensity along the proximal to distal length of respiratory MCC cilia. Fluorescent intensity average is depicted as a black line with one standard deviation displayed in gray.

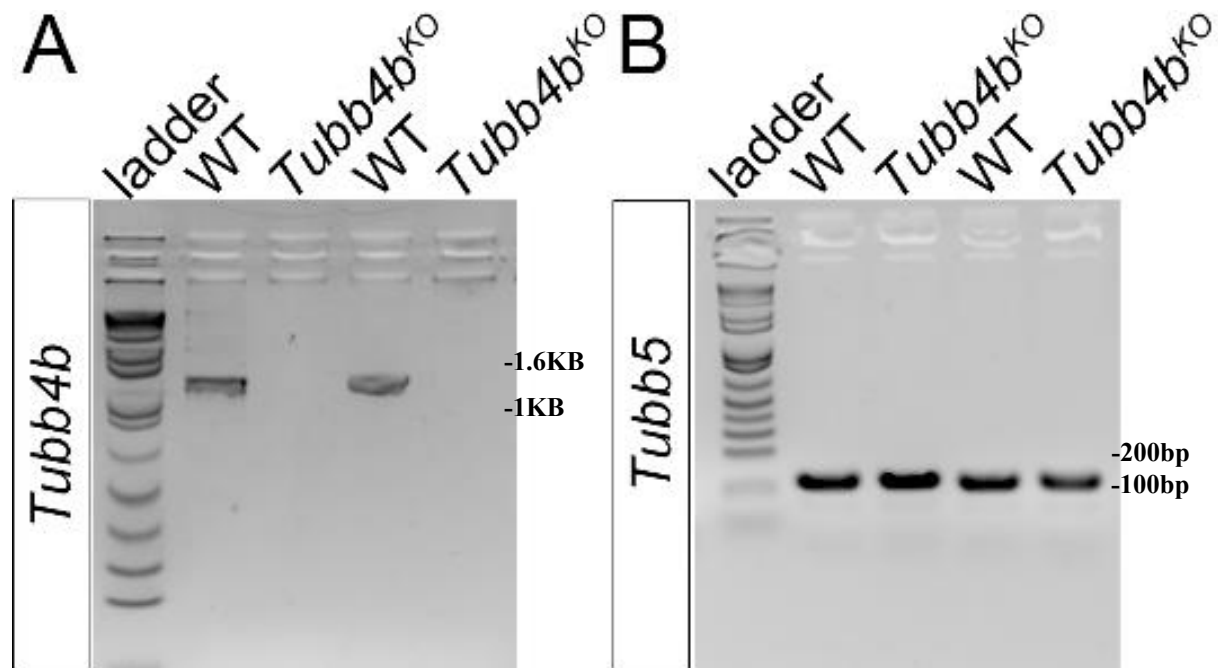

**Fig. S2. RT-PCR of *Tubb4b* in mutants**

(A) RT-PCR of *Tubb4b* homozygous mutant embryos and WT littermates using *Tubb4b* specific primers. Amplification of the predicted 1160 bp amplicon of *Tubb4b* was observed in the two control embryos but no bands were amplified from the two homozygous mutant embryos. (B) RT-PCR of identical *Tubb4b* homozygous mutant embryos and WT littermates using *Tubb5* specific primers. Amplification of the predicted 96 bp amplicon of *Tubb5* was observed in both control and *Tubb4b* embryos.

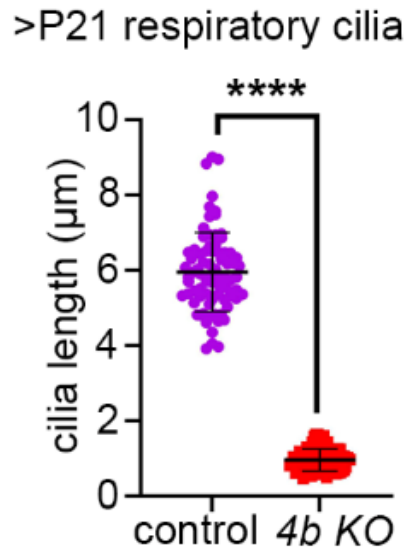

**Fig. S3. Cilia measurements of *Tubb4b* mutant MCC in adult animals**

Length of cilia in respiratory MCC in WT respiratory MCC ( $5.95 \pm 1.04 \mu\text{m}$ ,  $n=237$  cilia from 79 MCC) and in *Tubb4b KO* ( $0.96 \pm 0.29 \mu\text{m}$ ,  $n=267$  cilia from 89 MCC) as determined by Arl13b immunostaining. At least 25 cells from 3 animals/genotype were analyzed. \*\*\*\* $p < 0.0001$  unpaired t-test. All animals were age >P21.

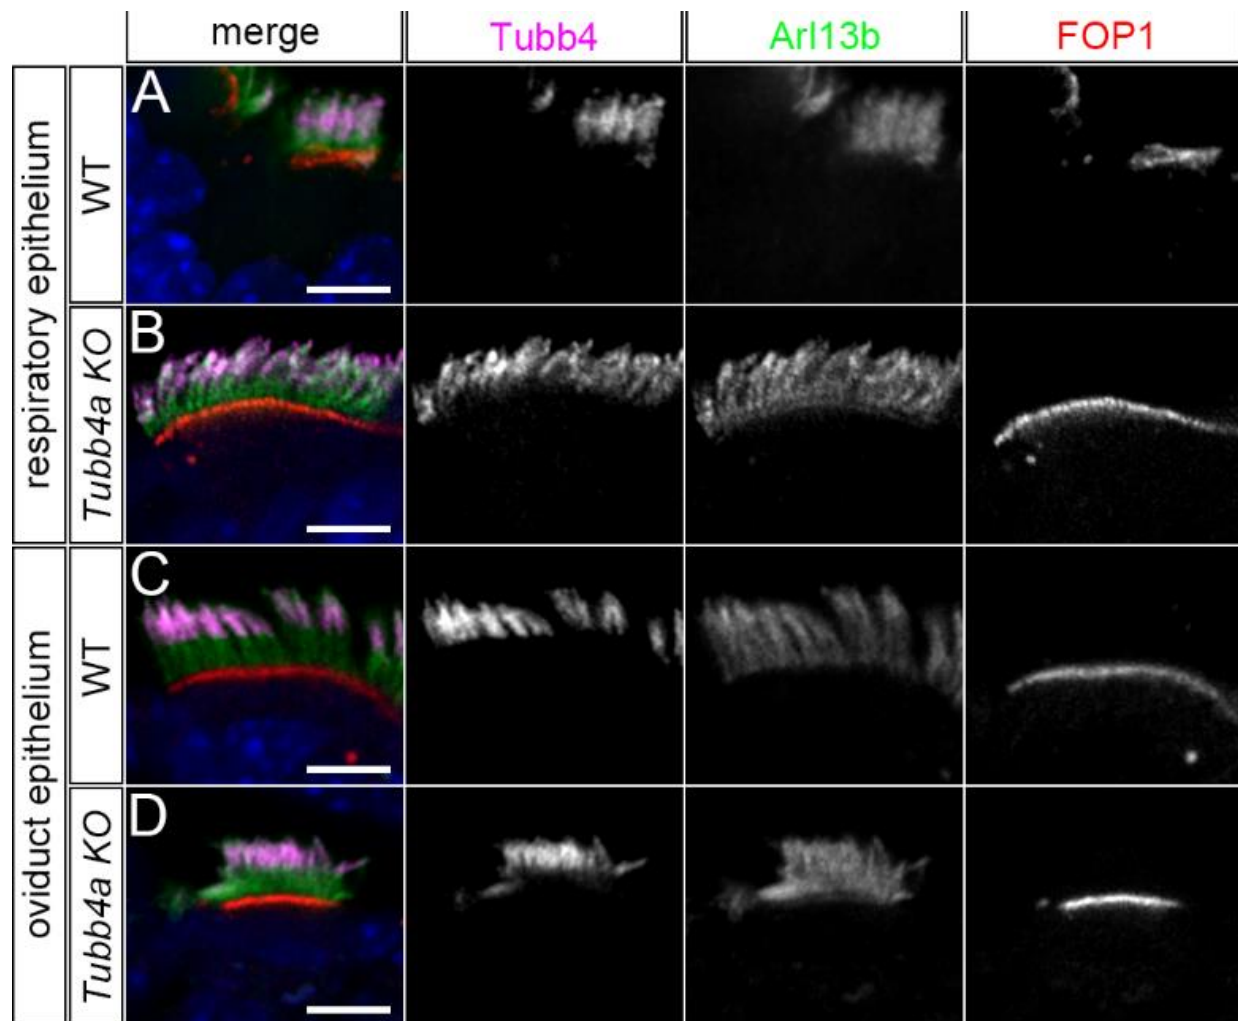

**Fig. S4. *Tubb4a*KO respiratory epithelium.** Immunofluorescence staining of (A) WT and (B) *Tubb4a*KO respiratory epithelium at P1. Scale=5 $\mu$ m. Immunofluorescence staining of (C) WT and (D) *Tubb4a*KO oviduct epithelium (adult). Scale=5 $\mu$ m.

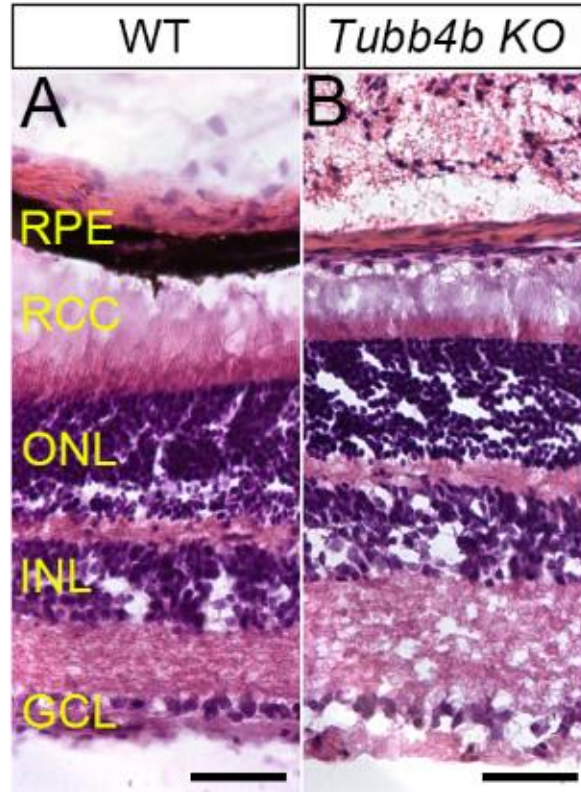

**Fig. S5. *Tubb4b*KO retinal analysis.** H&E staining of (A) WT retina (agouti animal) and (B) *Tubb4b* KO retina (albino animal) at P15. Scale=50µm. RPE=Retinal Pigmented Epithelium, RCC=Rod and Cone cells, ONL=Outer Nuclear Layer, INL=Inner Nuclear Layer, GCL=Ganglion Cell Layer.

**Table S1. Genotypes of *Tubb4b* animals in litters at different ages**

Numbers of animals of WT, heterozygous *Tubb4b* and homozygous *Tubb4b* animals at postnatal ages P0-P3 (14 litters), P4-P6 (9 litters), P7-P10 (18 litters).

| Litter age | WT | Het | Mut |
|------------|----|-----|-----|
| P0-P3      | 29 | 43  | 23  |
| P4-P6      | 21 | 25  | 7   |
| P7-P10     | 24 | 50  | 9   |
